# Supplementary material for: Low-Cost, High-Yield ZnO Nanostars Synthesis for Pseudocapacitor Applications
Source: MDPI journal article supplement (doi:10.3390/nano12152588), 2022-07-28
Supplement: s1 [file s1]

# Low-Cost, High-Yield ZnO Nanostars Synthesis for Pseudocapacitor Applications

Gisella Maria Di Mari <sup>1,2</sup>, Giacometta Mineo <sup>1,2</sup>, Giorgia Franzò <sup>2</sup>, Salvatore Mirabella <sup>1,2,\*</sup>, Elena Bruno <sup>1,2</sup> and Vincenzina Strano <sup>2</sup>

<sup>1</sup> Dipartimento di Fisica e Astronomia "Ettore Majorana", Università degli Studi di Catania, via S. Sofia 64, 95123 Catania, Italy; gisella.dimari@dfa.unict.it (G.M.D.M.); giacometta.mineo@dfa.unict.it (G.M.); elena.bruno@dfa.unict.it (E.B.)

<sup>2</sup> Consiglio Nazionale delle Ricerche, Istituto per la Microelettronica e i Microsistemi (CNR-IMM), Università degli Studi di Catania, via S. Sofia 64, 95123 Catania, Italy; giorgia.franzo@ct.infn.it (G.F.); vincenzina.strano@ct.infn.it (V.S.)

\* Correspondence: salvo.mirabella@dfa.unict.it

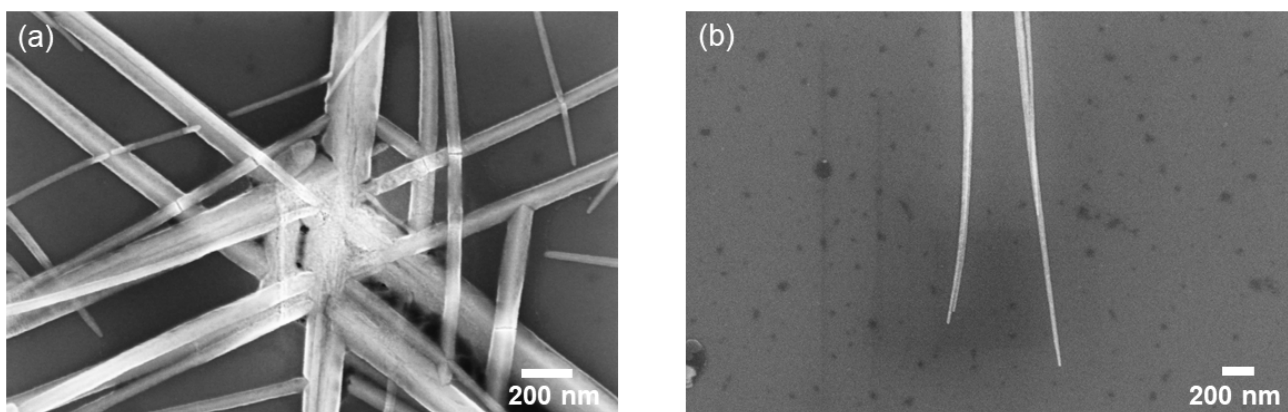

**Figure S1.** (a) High magnification SEM of an NS center and (b) an NS tip.

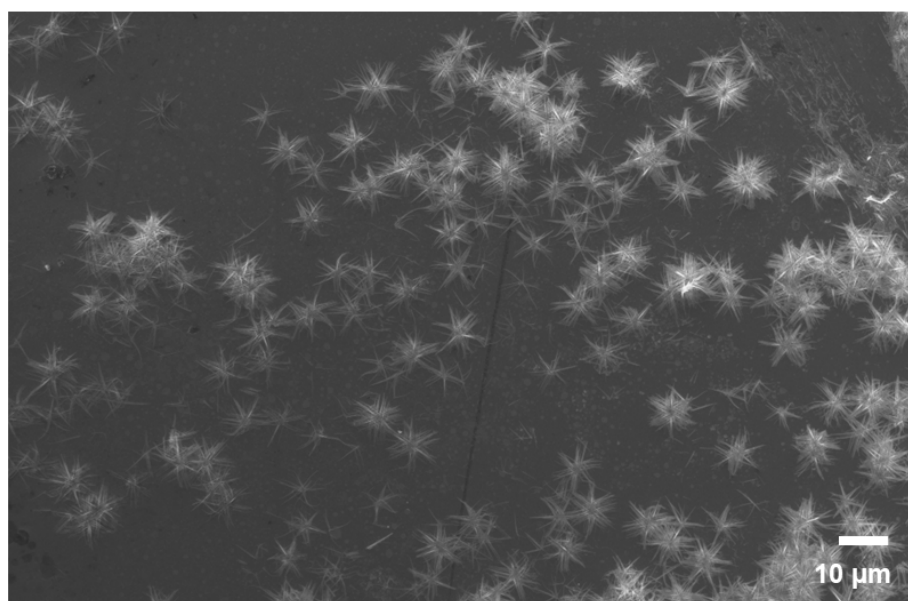

**Figure S2.** SEM image of AnnNSs.

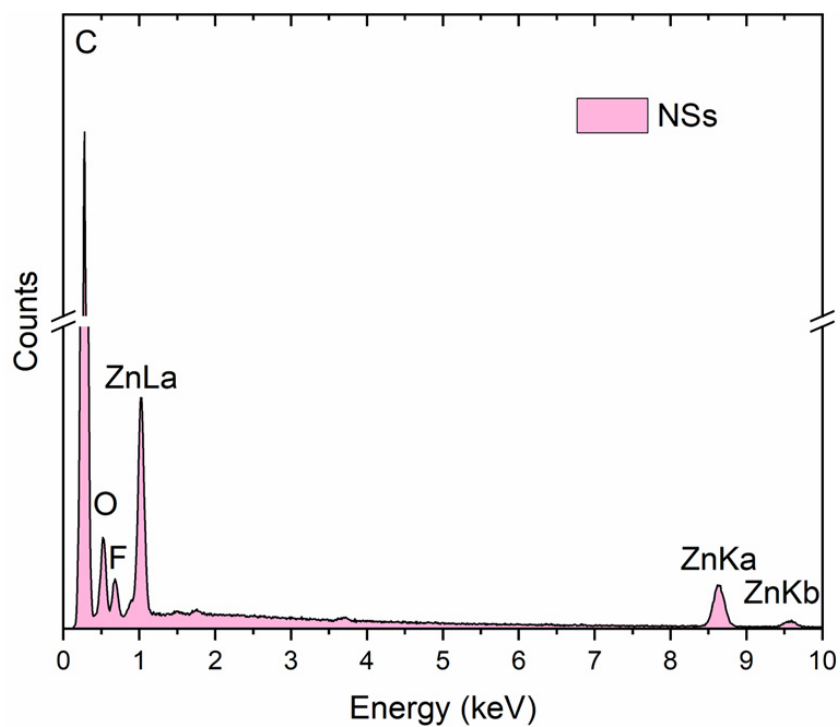

**Figure S3.** EDX spectrum taken in NSs grown for 10 min.

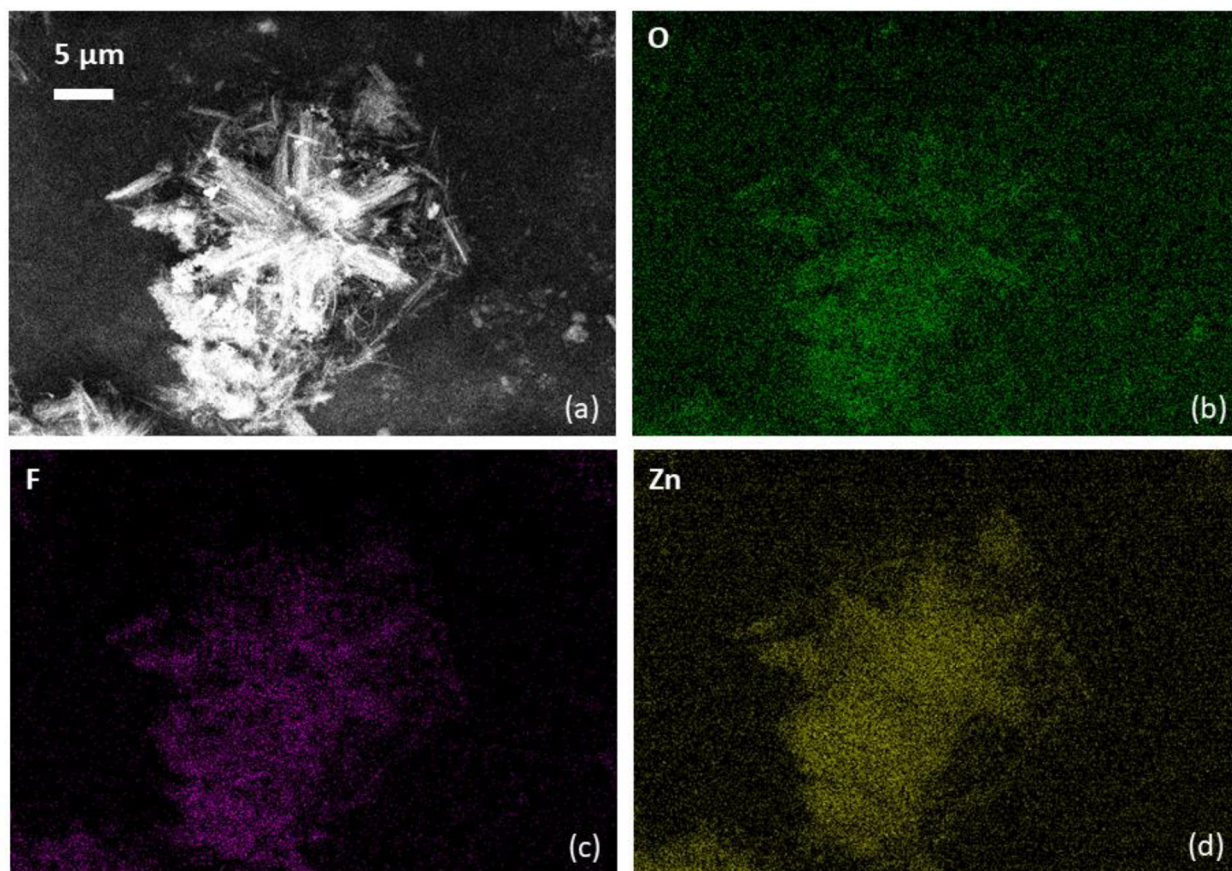

**Figure S4.** SEM micrograph of (a) single grown NS and (b–d) related SEM-EDX mapping for O, F and Zn elements respectively. EDX maps were acquired setting the operating voltage as 20 kV and a working distance of 8.5 mm.

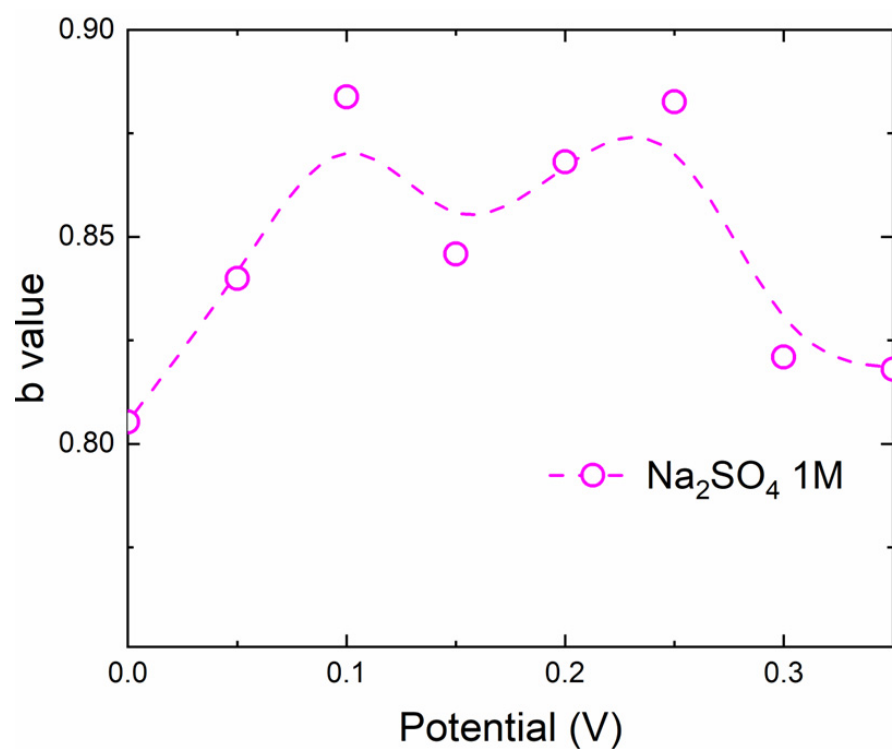

**Figure S5.** Extrapolated  $b$  values for 10 min NSs in 1 M  $\text{Na}_2\text{SO}_4$  at different scan rates as a function of potential values.

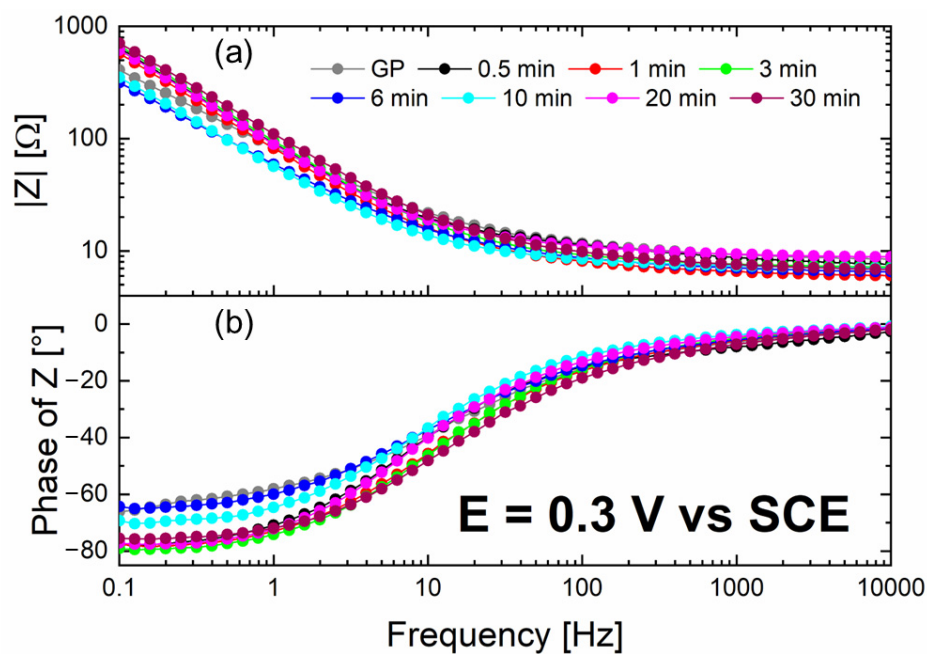

**Figure S6.** Bode Plot from the EIS analyses acquired at 0.3 V: (a) impedance modulus and (b) phase angle amplitudes for all growth times analyzed. Data for the GP substrate are also reported (GP grey, 0.5 min black, 1 min red, 3 min green, 6 min blue, 10 min light blue, 20 min magenta, and 30 min Bordeaux lines and circles).
